# Supplementary material
Source: PubMed Central journal article supplement (PMC6213316)
Supplement: blood862003-suppl1.pdf [file blood862003-suppl1.pdf]

## **Supplemental Material**

### **Supplemental Methods**

### **Supplemental Figure S1-S4**

### **Supplemental Tables S1, S2**

### **Supplemental Methods**

#### *Northern blot*

Total RNA from K562 cells was isolated using the RNeasy mini kit (Qiagen). Poly A (+) RNA was prepared from 75 µg of total RNA using the Dynabeads mRNA Purification Kit (Ambion) following the manufacturer instructions. The capture and elution of the poly (A)+ RNA was repeated 5 times until no poly (+) RNA was left in the sample. The quality of the RNA was evaluated using the Agilent RNA 6000 Nano kit. RNA samples (20 µg per lane/total RNA or 100 ng of poly (A)+ RNA) were denatured in MOPS/formaldehyde/formamide buffer and separated by electrophoresis on a 1% formaldehyde/agarose gel at low voltage. Following electrophoresis, RNA was transferred to the positively charged Brightstar-Plus membrane (Ambion) by capillary blotting (TurboBlotter, Schleicher & Schuell) overnight in 10× SSC. Resolved RNAs were cross-linked to the membrane by UV irradiation and incubated in hybridization solution (UltraHyb, Ambion) for 1 h at 45°C before addition of the probe. Radiolabeled DNA probes were prepared using the DECAprime II random priming Kit (Ambion). Labeled probes were purified using the NucAway Spin columns (Invitrogen), added to the hybridization mixture, and incubated overnight at 45°C. The blots were then washed using solutions containing decreasing concentrations of SDS and SSC (1× SSC is 0.15 M NaCl, 0.015M sodium citrate). Transcripts were visualized by autoradiography or Phospho Imager.

#### *BGLT3 overexpression studies*

To overexpress BGLT3, full length BGLT3 and GFP genes were cloned into the BamHI and XhoI sites of the vector pLenti/V5-D-TOPO (Invitrogen). 1x10<sup>6</sup> K562 cells were resuspended in 100 µl of nucleofector solution (Lonza) and 4 µg of DNA was added. The cells were transfected using the Nucleofector® technology system kit V (Lonza). Cells were harvested at 48 hours after transfection. Transfection efficiency was monitored by GFP expression under fluorescence microscopy. Total RNA was extracted and reverse transcribed and gene expression was determined by qRT-PCR.

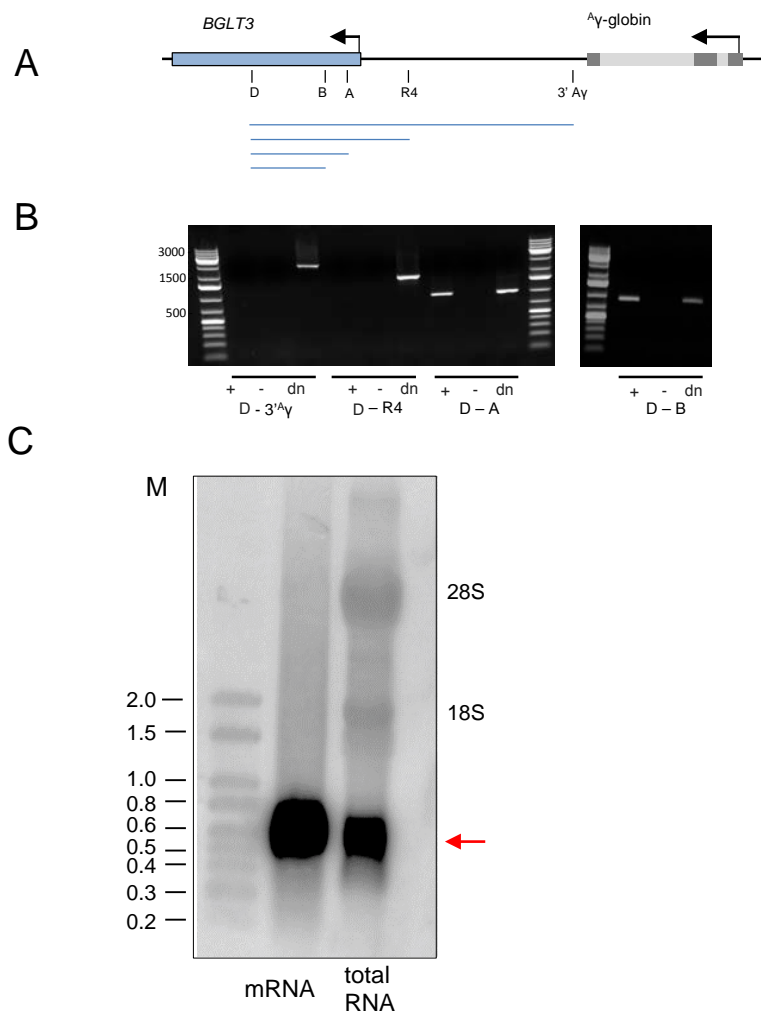

**Figure S1. Analysis of *BGLT3* lncRNA.** (A) Schematic diagram of  $\text{A}\gamma$ -globin and *BGLT3*. Black rectangles show location of primers for PCR reactions analyzed below. (B) PCR products were generated with (+) or without (-) cDNA or genomic DNA (dn) isolated from K562. For primer sequences see Table S1. (C) Total RNA and poly A+ RNA from K562 cells were separated on a denaturing gel and the  $\gamma$ -globin mRNA was visualized by Northern blot with a radiolabeled DNA probe. The 28S and 18S ribosomal RNAs are indicated.

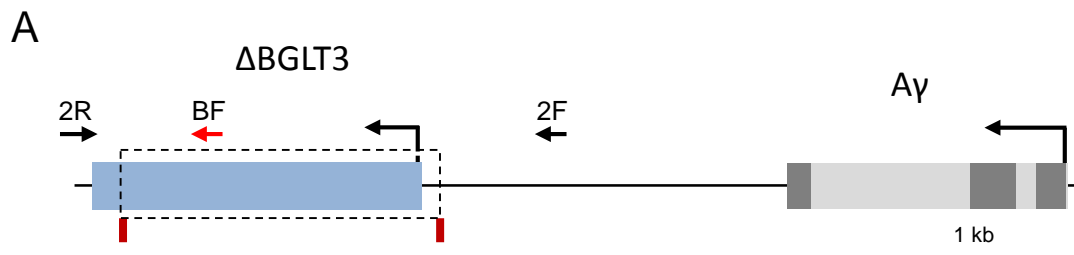

**B**

BGLT3 TCTG**TAGATTGCTCTTTCGCTCTGATGG**TAGTTTCTTTTGCTGAGCAGGAGCTCTTTAGTT  
 $\Delta BGLT3.2$  TCTGTAGATTGTCTTTCGCTCT-----  
 $\Delta BGLT3.30$  TCTGTAGATTGTCTTTCGCT-----

BGLT3 TAATTAGATTCCATTGGTCAATTTTTGCTTTTGCTGCAATTGCTTTT**CACGCT**TTTCATCA  
 $\Delta BGLT3.2$  -----  
 $\Delta BGLT3.30$  -----

BGLT3 TGAAATCTGTGCCCGTGTTTATAT CTTGCTTGAACAG  
 $\Delta BGLT3.2$  -----//----- 1509 bp -----//-----  
 $\Delta BGLT3.30$  -----//-----

BGLT3 AGCAGCACACTTCT**CCCCAACACTATTAGATGTTT**CGGCATAATTTTGTAGATATGTAG  
 $\Delta BGLT3.2$  -----TTCTGGCATAATTTTGTAGATATGTAG  
 $\Delta BGLT3.30$  -----TTCTGGCATAATTTTGTAGATATGTAG

BGLT3 GATTTGACATGGACTATTGTTCAATGATTCAGAGGAAATCTCCTTTGTTTCAGATAAGTAC  
 $\Delta BGLT3.2$  GATTTGACATGGACTATTGTTCAATGATTCAGAGGAAATCTCCTTTGTTTCAGATAAGTAC  
 $\Delta BGLT3.30$  GATTTGACATGGACTATTGTTCAATGATTCAGAGGAAATCTCCTTTGTTTCAGATAAGTAC

BGLT3 ACTGACTACTAAATGGATTAAAAAACACAGTAATAAAACCCAGTTTTCCCCTT  
 $\Delta BGLT3.2$  ACTGACTACTAAATGGATTAAAAAACACAGTAATAAAACCCAGTTTTCCCCTT  
 $\Delta BGLT3.30$  ACTGACTACTAAATGGATTAAAAAACACAGTAATAAAACCCAGTTTTCCC**CTT**

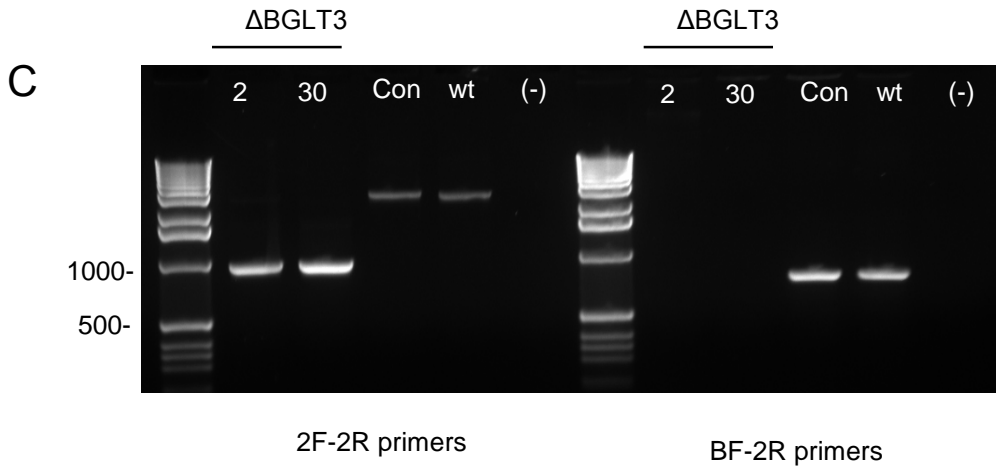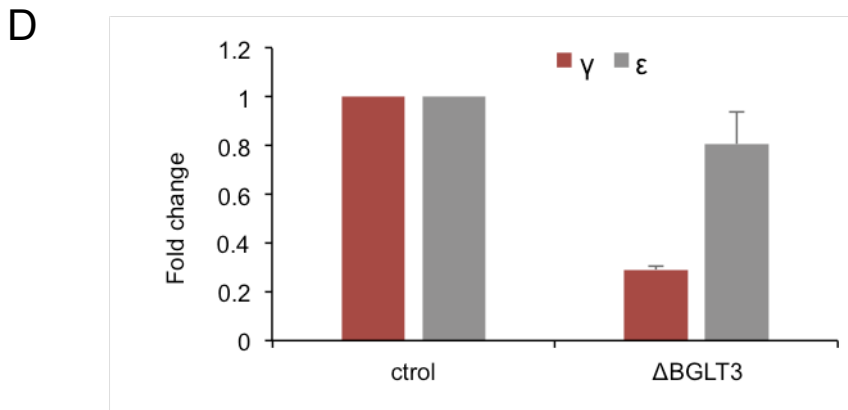

**Figure S2. Deletion of the *BGLT3* gene by CRISPR/Cas9 in K562 cells.** (A) The schematic diagram shows the deletion of the *BGLT3* gene generated by CRISPR/Cas9 using two gRNAs targeting the 5' and 3' ends of the *BGLT3* gene (red bars, dotted rectangle). Arrows indicate the primers used for the PCR screening. (B) Sequences of *BGLT3* deletion clones 2 and 30. Guide RNA targets are highlighted in green, PAM sequence is bolded and the first and last three nucleotides of *BGLT3* are highlighted in red and blue, respectively. (C) Electrophoretic analysis of PCR products generated from gDNA of  $\Delta$ BGLT3 (clones 2 and 30), control (cells transfected without gRNAs) and wild type K562 cells. The amplicons were generated using primers outside the deletion (2F-2R primers) and one primer (BF) inside the deleted region. The PCR products generated using the primers 2F and 2R were cloned and sequenced to verify the deletion. (D) Fold change of  $\gamma$ - and  $\epsilon$ -globin in *BGLT3* cells compared to control cells (ctrol). For gRNA and primer sequences see Table S1.

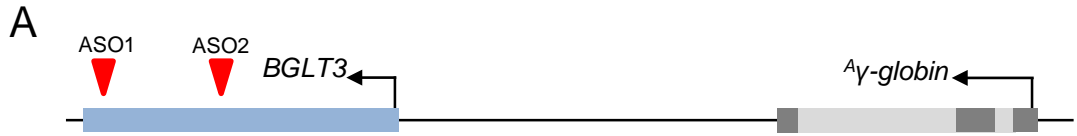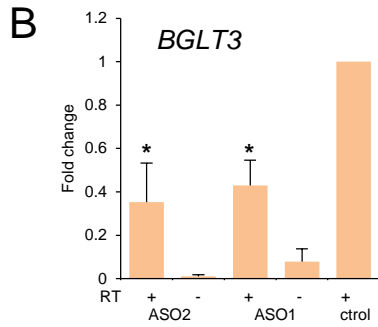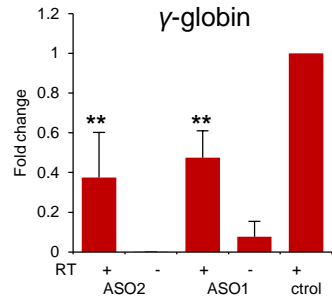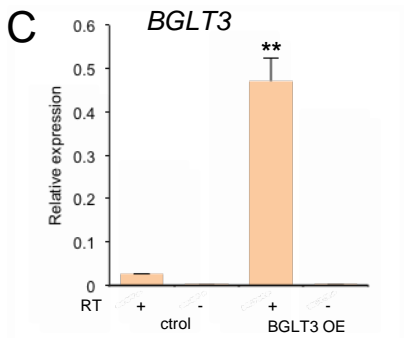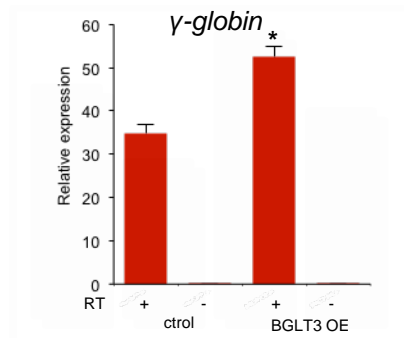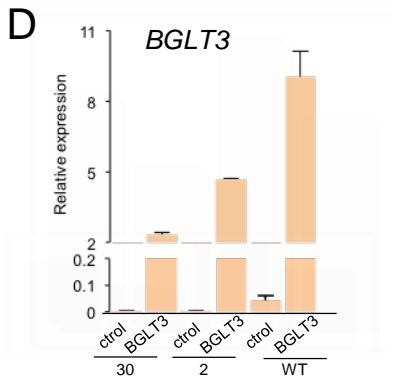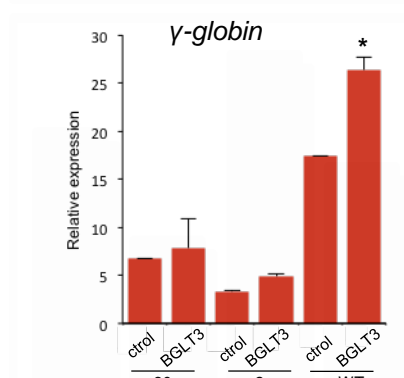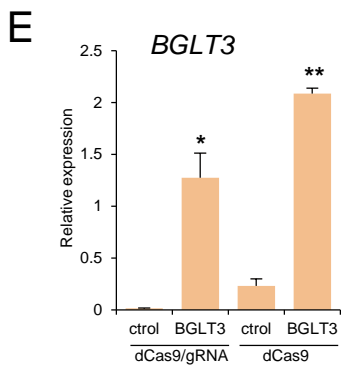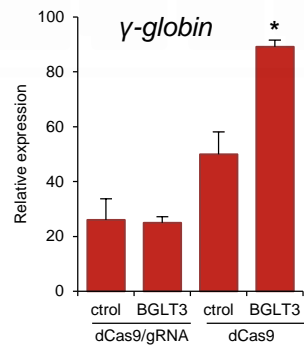

**Figure S3. Reduction and over-expression of *BGLT3* lncRNA  $\gamma$ -globin in K562 cells.** (A) Schematic representation of the  $\gamma$ -globin/*BGLT3* genomic region. Location of the target sites for the Locked Nucleic Acid (LNA) antisense oligos (B1 and B2 red arrowheads) are shown. (B) Expression of *BGLT3* and  $\gamma$ -globin was monitored by RT-q PCR after transfection of K562 cells with ASOs B1 and B2 compared to cells transfected with control ASOs. RT+, RT- indicate with/without reverse transcriptase. (C) Expression of *BGLT3* and  $\gamma$ -globin was monitored by RT-qPCR after transfection of K562 cells with a GFP control or with a *BGLT3* overexpression (OE) vector. RT+, RT- indicate with/without reverse transcriptase. (D) Transfection of  $\Delta$ *BGLT3* clones 2 and 30 (see Figure 2) and control cells with a GFP-only vector or a *BGLT3* overexpression vector. (E) Expression of *BGLT3* and  $\gamma$ -globin was monitored by RT-qPCR after transfection of a GFP control or a *BGLT3* overexpression vector into K562 clones targeted with dCAS9 and either with or without a *BGLT3*-specific gRNA. For panels B-D, RT-qPCR results were normalized to actin. Two-tailed student's t-tests \*  $p < 0.05$  \*\*,  $p < 0.01$ . Error bars indicate SD, n=3. For ASO and primer sequences see Table S1.

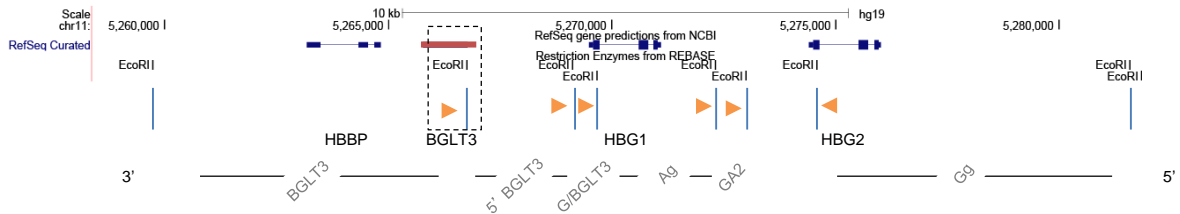

**Figure S4. BGLT3 locus EcoRI fragments interrogated by 3C.** EcoRI cutting sites are denoted by vertical bars and the location of the primers used to determine the interaction frequency between each fragment and the anchor are denoted by yellow triangles. The interaction frequency reported for the primer within the fragment containing the *HBG2* gene (Gg) represents the values for interaction of both *HBG1* and *HBG2* with the LCR. This is because the sequences at the 3' end of each of these fragments are identical. The 5' end of the *HBG2* gene cannot be used for a primer because the sequences are repetitive. Only the *HBG1* gene (Ag fragment) can be probed uniquely at the 5' end.

The BGLT3 sequences deleted by CRISPR/Cas9 are within the dotted rectangle. After this deletion, which removes an EcoRI site, the primer on the 5' end of the new fragment can still be used to interrogate LCR proximity (Figure 4A) and it can be used as the anchor primer to determine BGLT3 proximity (Figure 4B) and can be used as the anchor primer when *BGLT3* proximity is probed (Figure 4B).

**Table S1- Primers sequences**

| <b>Name</b>             | <b>Sequence 5'-3'</b>           |
|-------------------------|---------------------------------|
| <b>RACE</b>             |                                 |
| 3' RACE Outer F         | AATGACCTAATGCCCAGCAC            |
| 5' RACE Nested R        | TATTGAGTTGTGGGACTGGC            |
| 5' RACE Outer R         | GGAACATGGGGAAAGTTTGTAGT         |
| <b>PCR</b>              |                                 |
| 3' UTR Y <sup>A</sup> F | ATGCACACACCACAAACACA            |
| 5' BGL3 F               | GAGAAGTTGACAACCTGCAATGATAACCTGG |
| BGLT3 B R               | TCTACTTGATATAGTTGAGAGGCAGTTACC  |
| BGLT3 TSS F             | CTAGGCTTTTTATAGTTTGGGGT         |
| BGLT3 UP F              | CTCCCCATCATTATTAATGAA           |
| Crispr 2F               | CTCCCCTCGTCCCCTATGTTT           |
| Crispr 2R               | CACCTCTATCCAGCATCAACTTGG        |
| R3 F                    | TCACAGTGCTGGTCTGTTTCTCA         |
| R4 F                    | TGCCTGGCTCCATCATATCA            |
| <b>Real Time qPCR</b>   |                                 |
| Actin F                 | GAGGCCAGAGCAAGAGA               |
| Actin R                 | AATCCATTTTCGGCAAAGAATTC         |
| Actin intron 3 F        | ACAGACTCCCCATCCCAAGAC           |
| Actin intron 3 R        | GGACATGCAGAAAGTGCAAAGA          |
| Bcl 11A F               | AATGACCTAATGCCCAGCAC            |
| Bcl 11A R               | AGTGTGGGGGAGAAGTGTG             |
| BGLT3 5' F              | GAGAAGTTGACAACCTGCAATGATAACCTGG |
| BGLT3 5' R              | CCCCATTTCCAATTGTTTTCCATGATTAT   |
| BGLT3 A F               | GGGAACAGCCACAAACAAGAAAGA        |
| BGLT3 A R               | CAGCCAACCAGGAATTCAGCAGTT        |
| BGLT3 B F               | AAGATAATCTTGGTTTTGCCTCAA        |
| BGLT3 B R               | TCTACTTGATATAGTTGAGAGGCAGTTACC  |
| dCas9/gRNA3 A F         | CTTTTCGCTCTGATGGTAGTTTCTTT      |
| dCas9/gRNA3 A R         | GCAAAAATTGACCAATGGAATCT         |
| dCas9/gRNA3 B F         | AGATTCCATTGGTCAATTTTTGC         |
| dCas9/gRNA3 B R         | CGGGCACAGATTTTCATGATG           |
| GAPDH F                 | ACCACAGTCCATGCCATCACT           |
| GAPDH R                 | CCATCACGCCACAGTTTCC             |
| MALAT1 exon1F           | CAGACACACGTATGCGAAGG            |
| MALAT1 exon 1R          | TAGTGGTTCCCAATCCCCAC            |
| LCR HS2 F               | AAACAGGAAAAGAAAACAAACCTTGT      |
| LCR HS2 R               | CACAGGCCTTTTTGCCACCTA           |
| Y exon 2 F              | TGG CAA GAA GGT GCT GAC TTC     |
| Y exon 2 R              | GCA AAG GTG CCC TTG AGA TC      |
| Y exon 3 F              | AATCCATTTTCGGCAAAGAATTC         |
| Y exon 3 R              | CCACTCCAGTCACCATCTTCTG          |
| Y promoter F            | CAAATATCTGTCTGAAACGGTTCCCT      |
| Y promoter R            | TGCCTTGTCAAGGCTATTGGT           |
| Y TSS F                 | TGGCTAGGGATGAAGAATAAAAGG        |



Y TSS R  
Y1 intron2 F  
Y2 intron 2F  
Y2/1 intron 2R

ATTGATAATCTCAGACGTTCCAGAAG  
TTTCATCTTTCCCTCATTTTTG  
CTTTCCCCTATTTTTGTTATTCTG  
TTTGTAATGAAGCATTAGCAGCA

**LNA-ASO**

BGLT3 ASO1  
BGLT3 ASO2

TTAAGAGCAGAGATCG  
CCATTTAGTAGTCAGT

**CRISPR-gRNA**

gRNA3 SE  
gRNA3 AS  
gRNA2 SE  
gRNA2 AS  
gRNA LDB1 SE  
gRNA LDB1 AS

**Gene specific sequence**

CACCGTAGATTGTCTTTTCGCTCTGA  
AAACTCAGAGCGAAAGACAATCTAC  
CACCGCCAACACTATTAGATGTTT  
AAACGAACATCTAATAGTGTGGC  
CACCGTGGCAACTTTGACTATATGC  
AAACGCATATAGTCAAAGTTGCCAC

**Chromatin Capture 3C**

**EcoRI fragment**

3' BGLT3  
3' Beta  
5' BGLT3  
Ag  
Beta  
BGLT3  
Delta  
Epsilon  
G/BGLT3  
GA2  
Gg  
HS432

TGTGAAAGCAGACATGAATGG  
AGCTTAGTGATACTTGTGGGCCA  
CTTAGGCATCCACAAGGG  
ATCCATGATCTCTAACCTTGC  
GCTCGGCACATGTCCCATCCAG  
TTGCCATACCTCATATCCTTAG  
AAAAAATGTGGAATTAGACCCAGGAATG  
ATTAACCAATGGTATCTTTCTGAGCA  
AGCAAGGATGGTTCTTAAGGAAGGG  
AATTTGAAGATACAGCTTGCCTCCGATAAG  
GGGTTTATCTTTATTGTCTCCT  
CCAAATGGGTGACTGTAGGGTTGAGA

**Northern Blot Probe**

Y transcript F  
Y transcript R

GCCTGCAGGAAGCACCCCTTCAGCAGTTC  
GCGAAGCTTAGCTCTGAATCATGGGCAGT

## Supplemental Table S2-Antibodies

| <b>Name</b>                      | <b>Company</b> | <b>Catalog number</b> |
|----------------------------------|----------------|-----------------------|
| Anti-HA tag                      | Abcam          | ab9110                |
| Anti-histone H3                  | Abcam          | ab1791                |
| Anti-histone H3 (acetyl K27)     | Abcam          | ab4729                |
| Anti-histone H3 (mono methyl K4) | Abcam          | ab8895                |
| Anti-histone H3 (tri methyl K36) | Abcam          | ab9050                |
| Anti-histone H3 (tri methyl K4)  | Abcam          | ab8580                |
| Anti-p300/CBP (N-15)             | Santa Cruz     | sc-584                |
| Anti-Pol II (N20)                | Santa Cruz     | sc-899X               |
| Anti-TATA binding protein (TBP)  | Abcam          | ab-63766              |
| Normal rabbit IgG                | Santa Cruz     | sc-2027               |
| <b>RNA ChIP</b>                  |                |                       |
| Anti-Med12                       | Bethyl         | A300-774A             |
| Anti-CBP                         | Santa Cruz     | sc-583                |
| Anti-Rad21                       | Abcam          | ab992                 |
